# Supplementary material for: Nanofiltration membrane with a reactive, positively charged nanofiber interlayer for recycling lithium from waste batteries
Source: Royal Society of Chemistry journal article supplement (doi:10.1039/d4nj05377j), 2025-01-01
Supplement: d4nj05377j1.pdf [file d4nj05377j1.pdf]

Nanofiltration membrane from reactive positively charged nanofiber interlayer  
for recycling lithium from waste batteries

Shuqing Cao<sup>a</sup>, Jingjing Wang<sup>a</sup>, Qin Cheng<sup>a</sup>, Yi Wu<sup>a</sup>, Jia Xu<sup>a</sup>, Ming Xia<sup>a</sup>, Ke Liu<sup>a</sup>,  
Shanshan He<sup>a,\*</sup>, Dong Wang<sup>a,\*</sup>

<sup>a</sup> Key Laboratory of Textile Fiber and Products, Ministry of Education, Hubei  
International Scientific and Technological Cooperation Base of Intelligent Textile  
Materials & Application, Wuhan Textile University, Wuhan 430200, China

## **Characterization**

Surface and cross-sectional morphologies of membrane samples were taken in JEOL JSM-6510L scanning electron microscope after coated by platinum. The chemical structure of primary and modified NFM was characterized by FTIR-ATR spectrometer (Tensor27, Bruker) and X-ray photoelectron instrument (XPS, Thermo Electron Co.). The static water contact angle of membranes was measured by using contact angle goniometry (KRUSS DSA30S, KRUSS Co., Germany). The concentration of single salt was measured by conductivity meter, and the concentration of mixed salt was measured by inductively coupled plasma mass spectrometry (ICP). A total organic carbon analyzer (TOC-5050A, Shimadzu, Japan) was utilized to measure the concentration of PEG solution with different molecular weights.

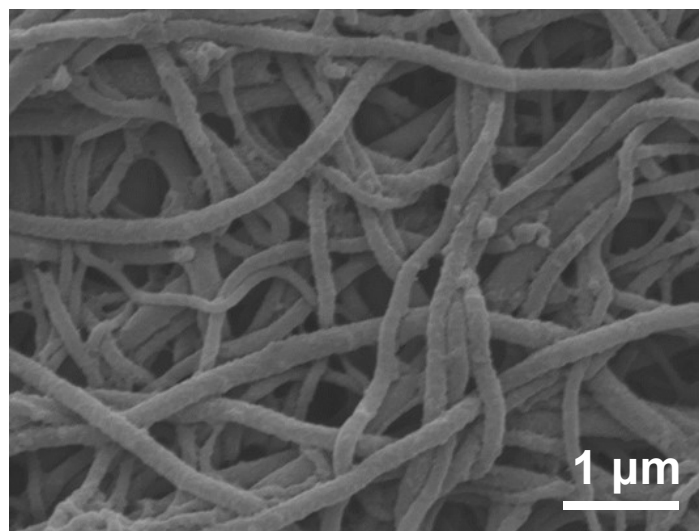

**Figure S1** The SEM image of EVOH nanofiber membrane crosslinked via GA

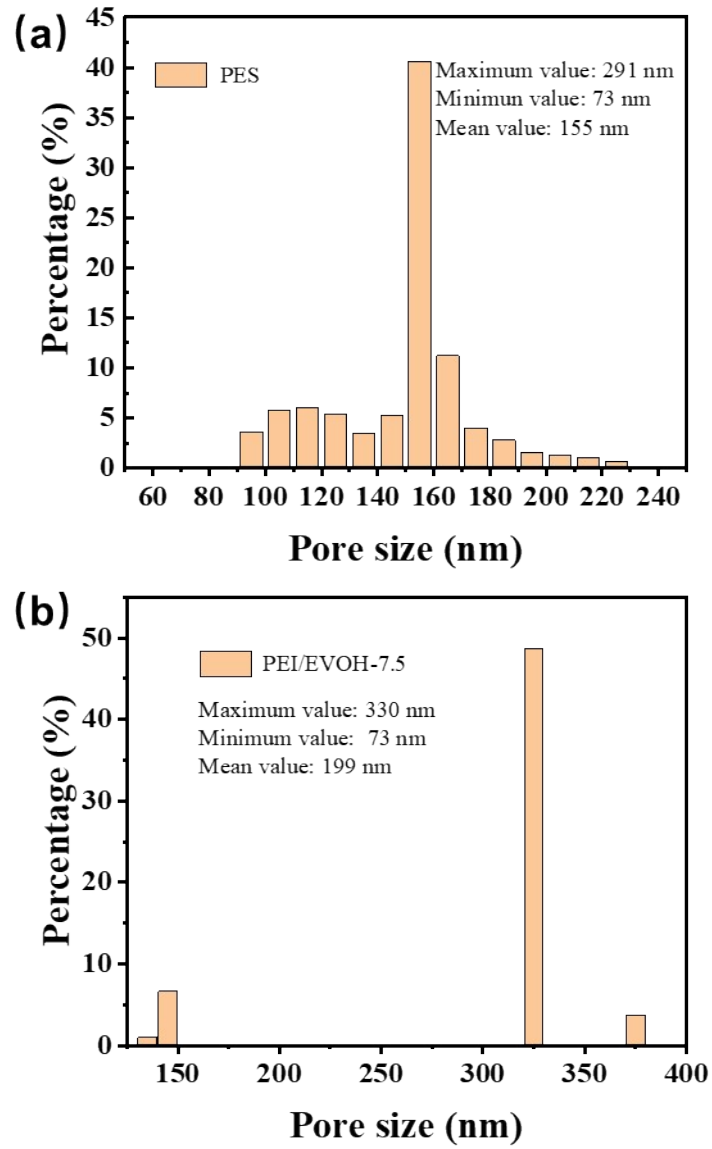

**Figure S2** The pore size and distribution of (a) PES membrane and (b) PEI/EVOH-7.5.

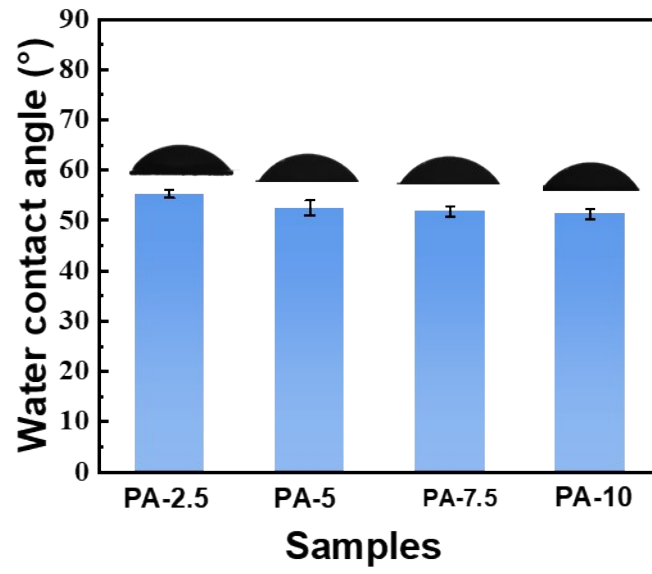

**Figure S3** Water contact angles of nanofiltration membranes at various PEI content

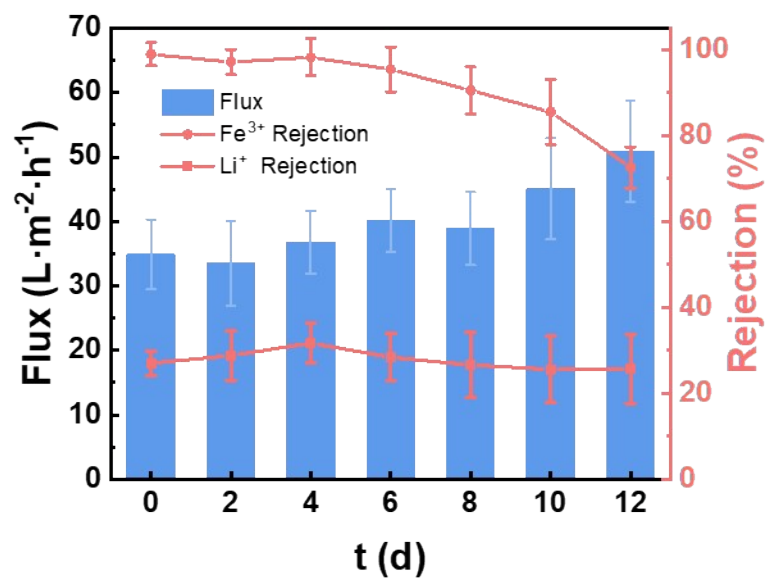

**Figure S4** Separation performance with continuous filtration time (Feed: 2000 ppm LiCl&FeCl<sub>3</sub> mixture solution, Fe/Li ratio of 10, pH adjusted to 1.5)

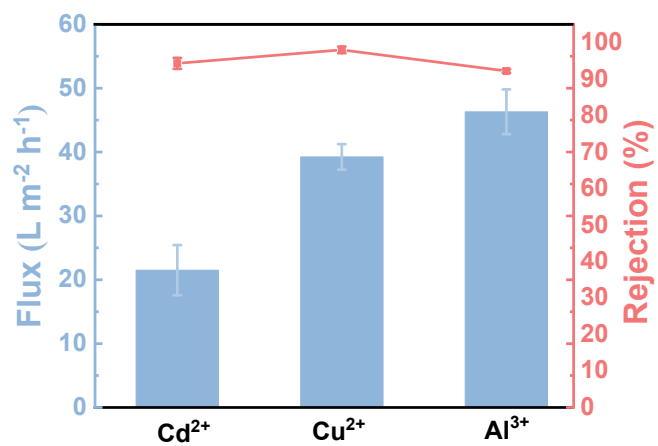

**Figure S5** Heavy metal ion aqueous solution flux and rejection of PA-7.5 at the pressure of 0.6 Mpa

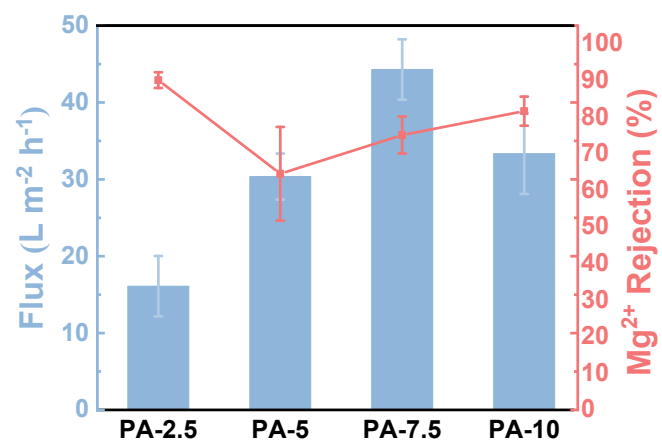

**Figure S6**  $\text{MgCl}_2$  aqueous solution flux and  $\text{Mg}^{2+}$  rejection of nanofiltration membranes at the pressure of 0.6 Mpa



Table S1 Comparison of the performance of the reported PEI-based NF membranes in literatures

| Membranes                      | Selective layer thickness (nm) | PWP (L m <sup>-2</sup> h <sup>-1</sup> bar <sup>-1</sup> ) | Mg <sup>2+</sup> rejection (%) | Ref.             |
|--------------------------------|--------------------------------|------------------------------------------------------------|--------------------------------|------------------|
| PEI-TMC composite NF membrane  | ~65                            | 5.02 (at 8 bar)                                            | 95                             | [13]             |
| PSF/DTES/PEI-TMC               | 132                            | 6.2 (at 8 bar)                                             | 92                             | [22]             |
| Polyetherimide /TMC/BPEI /EDTA | 135                            | 0.6 (at 10 bar)                                            | 92                             | [36]             |
| PSF/PEI-TMC/QBPD               | 116                            | 16.1(at 6 bar)                                             | 92                             | [37]             |
| PES/CNC-COOH/PEI-TMC           | 60                             | 3.4 (at 8 bar)                                             | 96                             | [24]             |
| APVC-PEI-TMC(DPCL-2)           | 299                            | 3.546 (at 6 bar)                                           | 95                             | [38]             |
| <b>PA-7.5</b>                  | <b>222</b>                     | <b>6.7 (at 6 bar)</b>                                      | <b>75</b>                      | <b>This work</b> |
